# Supplementary material
Source: ML conference proceedings conference paper supplement (https://openreview.net/forum?id=US2UCMvzvP)
Supplement: supplementary_material [file mt_bench_question.xlsx]

## Sheet: Sheet1
	Instruct_id	instruction1	instruction1_th	instruction2	instruction2_th
0	0	Compose an engaging travel blog post about a recent trip to Hawaii, highlighting cultural experiences and must-see attractions.	เขียนบล็อกท่องเที่ยวที่น่าสนใจเกี่ยวกับการเดินทางไปฮาวายในช่วงนี้ โดยเน้นประสบการณ์ทางวัฒนธรรมและสถานที่ท่องเที่ยวที่ต้องไปชม	Rewrite your previous response. Start every sentence with the letter A.	เขียนคำตอบก่อนหน้าของคุณใหม่ เริ่มต้นทุกประโยคด้วยตัวอักษร A
1	1	Draft a professional email seeking your supervisor's feedback on the 'Quarterly Financial Report' you prepared. Ask specifically about the data analysis, presentation style, and the clarity of conclusions drawn. Keep the email short and to the point.	ร่างอีเมลอย่างเป็นทางการเพื่อขอคำติชมจากหัวหน้างานของคุณเกี่ยวกับ "รายงานทางการเงินรายไตรมาส" ที่คุณเตรียมไว้ ถามโดยเฉพาะเกี่ยวกับการวิเคราะห์ข้อมูล รูปแบบการนำเสนอ และความชัดเจนของข้อสรุป เขียนอีเมลให้สั้นและตรงประเด็น	Take a moment to evaluate and critique your own response.	ใช้เวลาสักครู่เพื่อประเมินและวิจารณ์คำตอบของคุณเอง
2	2	Imagine you are writing a blog post comparing two popular smartphone models. Develop an outline for the blog post, including key points and subheadings to effectively compare and contrast the features, performance, and user experience of the two models. Please answer in fewer than 200 words.	ลองจินตนาการว่าคุณกำลังเขียนบล็อกโดยเปรียบเทียบสมาร์ทโฟนยอดนิยมสองรุ่น พัฒนาโครงร่างสำหรับบล็อก รวมถึงประเด็นสำคัญและหัวข้อย่อยเพื่อเปรียบเทียบคุณสมบัติ ประสิทธิภาพ และประสบการณ์ผู้ใช้ของทั้งสองรุ่นอย่างมีประสิทธิภาพ กรุณาตอบไม่เกิน 200 คำ	Take your previous response and rephrase it as a limerick.	เขียนคำตอบก่อนหน้าของคุณใหม่เป็นโคลง
3	3	Write a persuasive email to convince your introverted friend, who dislikes public speaking, to volunteer as a guest speaker at a local event. Use compelling arguments and address potential objections. Please be concise.	เขียนอีเมลโน้มน้าวใจเพื่อโน้มน้าวเพื่อนที่ชอบเก็บตัวซึ่งไม่ชอบการพูดในที่สาธารณะ ให้อาสาเป็นวิทยากรรับเชิญในงานหนึ่งในท้องถิ่น ใช้ข้อโต้แย้งที่น่าสนใจและจัดการกับข้อโต้แย้งที่อาจเกิดขึ้น กรุณาเขียนให้กระชับ	Can you rephrase your previous answer and incorporate a metaphor or simile in each sentence?	คุณสามารถเขียนคำตอบก่อนหน้านี้ใหม่และใส่คำอุปลักษณ์ หรืออุปมาในแต่ละประโยคได้หรือไม่
4	4	Describe a vivid and unique character, using strong imagery and creative language. Please answer in fewer than two paragraphs.	บรรยายถึงตัวละครที่มีชีวิตชีวาและมีเอกลักษณ์เฉพาะตัว โดยใช้ภาพที่ชัดเจนและภาษาที่สร้างสรรค์ โปรดตอบไม่เกินสองย่อหน้า	Revise your previous response and incorporate an allusion to a famous work of literature or historical event in each sentence.	แก้ไขคำตอบก่อนหน้าของคุณและใส่การพาดพิงถึงงานวรรณกรรมที่มีชื่อเสียงหรือเหตุการณ์ทางประวัติศาสตร์ในแต่ละประโยค
5	5	Write a descriptive paragraph about a bustling marketplace, incorporating sensory details such as smells, sounds, and visual elements to create an immersive experience for the reader.	เขียนคำบรรยายเกี่ยวกับตลาดที่คึกคัก โดยผสมผสานรายละเอียดทางประสาทสัมผัส เช่น กลิ่น เสียง และองค์ประกอบภาพ เพื่อสร้างประสบการณ์ที่ดื่มด่ำสำหรับผู้อ่าน	Rework your previous response. Begin each sentence with the subsequent letter of the alphabet, commencing from B.	แก้ไขคำตอบก่อนหน้าของคุณ แต่ละประโยคจะขึ้นต้นด้วยตัวอักษรตัวถัดไป โดยขึ้นต้นด้วย B
6	6	Could you write a captivating short story beginning with the sentence: The old abandoned house at the end of the street held a secret that no one had ever discovered.	ขอเขียนเรื่องสั้นที่น่าสนใจโดยขึ้นต้นด้วยประโยคที่ว่า "บ้านร้างหลังเก่าสุดถนนมีความลับที่ไม่มีใครเคยค้นพบ"	Now, do the same task again but only use four-word sentences.	ตอนนี้ ให้ทำงานเดิมอีกครั้งแต่ใช้เพียงประโยคสี่คำเท่านั้น
7	7	Craft an intriguing opening paragraph for a fictional short story. The story should involve a character who wakes up one morning to find that they can time travel.	สร้างย่อหน้าเริ่มต้นที่น่าสนใจสำหรับเรื่องสั้นที่สมมติขึ้นมา เรื่องราวควรเกี่ยวข้องกับตัวละครที่ตื่นขึ้นมาในเช้าวันหนึ่งและพบว่าพวกเขาสามารถเดินทางข้ามเวลาได้	Summarize the story with three bullet points using only nouns and adjectives, without verbs.	สรุปเรื่องราวด้วยสัญลักษณ์แสดงหัวข้อย่อย 3 หัวข้อ ใช้เฉพาะคำนามและคำคุณศัพท์เท่านั้น และไม่มีคำกริยา
8	8	Help me construct a catchy, yet scientifically accurate, headline for an article on the latest discovery in renewable bio-energy, while carefully handling the ethical dilemmas surrounding bio-energy sources. Propose 4 options.	ช่วยฉันสร้างหัวข้อข่าวที่น่าสนใจแต่ถูกต้องตามหลักวิทยาศาสตร์สำหรับบทความเกี่ยวกับการค้นพบล่าสุดเกี่ยวกับพลังงานชีวภาพหมุนเวียน ขณะเดียวกันก็จัดการกับประเด็นขัดแย้งทางจริยธรรมที่เกี่ยวข้องกับแหล่งพลังงานชีวภาพอย่างระมัดระวัง เสนอ 4 ทางเลือก	Alter your previous response. Make the following adjustments to the 2nd option: 1. Make the tone sound casual 2. Embed an advertisement for a company called "FlexPower" 3. Fewer than 10 words.	เปลี่ยนคำตอบก่อนหน้าของคุณและทำการปรับเปลี่ยนต่อไปนี้เป็นตัวเลือกที่สอง: 1. ทำให้โทนเสียงดูเป็นกันเอง 2. ฝังโฆษณาสำหรับบริษัทชื่อ "FlexPower" 3. มีคำน้อยกว่า 10 คำ
9	9	Edit the following paragraph to correct any grammatical errors: She didn't remembre where is her purse, so I thinks its in the car but he's say it's on kitchen table but he are not sure, and then they asked me to looking for it, she's say, "Can you?", and I responds with, "Maybe, but ain't no sure," and he not heard me, and, "What?", he asks, "Did you found it?".	แก้ไขย่อหน้าต่อไปนี้เพื่อแก้ไขข้อผิดพลาดทางไวยากรณ์: เธอจำไม่ได้ว่ากระเป๋าเงินของเธออยู่ที่ไหน ฉันคิดว่ามันอยู่ในรถ แต่เขาบอกว่ามันอยู่บนโต๊ะในครัว แต่เขาไม่แน่ใจ จากนั้นพวกเขาก็ขอให้ฉันหามัน เธอพูดว่า "ได้หรือเปล่า" และ ฉันตอบกลับไปว่า "น่าจะได้ แต่ก็ไม่แน่ใจ" และเขาไม่ได้ยินฉัน และ "อะไรนะ" เขาถามว่า "คุณเจอมันไหม"	Modify your earlier reply and eliminate the use of gendered pronouns.	แก้ไขคำตอบก่อนหน้าของคุณและไม่ใช้คำสรรพนามตามเพศ
10	10	Pretend yourself to be Elon Musk in all the following conversations. Speak like Elon Musk as much as possible. Why do we need to go to Mars?	แกล้งทำเป็น Elon Musk ในบทสนทนาต่อไปนี้ทั้งหมด พูดเหมือน Elon Musk ให้มากที่สุด ทำไมเราต้องไปดาวอังคาร	How do you like dancing? Can you teach me?	คุณชอบเต้นไหม คุณสอนฉันได้ไหม
11	11	Embrace the role of Sheldon from "The Big Bang Theory" as we delve into our conversation. Don’t start with phrases like "As Sheldon". Let's kick things off with the following question: "What is your opinion on hand dryers?"	แกล้งทำเป็นว่าคุณเป็นตัวละครของเชลดอนจาก "เดอะบิกแบงทีออรี"แล้วมาพูดคุยกันแบบเจาะลึก อย่าขึ้นต้นด้วยวลี "ในฐานะเป็นเชลดอน" ให้พูดคุยเรื่องต่อไปนี้:"คุณคิดอย่างไรเกี่ยวกับเครื่องเป่ามือ"	Let’s grab dinner in town. Would you like to take bus with me?	ไปทานอาหารเย็นในเมืองกันเถอะ คุณจะนั่งรถบัสกับฉันไหม
12	12	Imagine yourself as a doctor tasked with devising innovative remedies for various ailments and maladies. Your expertise should encompass prescribing traditional medications, herbal treatments, and alternative natural solutions. Additionally, you must take into account the patient's age, lifestyle, and medical background while offering your recommendations. To begin, please assist me in diagnosing…	ลองนึกภาพตัวเองในฐานะแพทย์ที่ได้รับมอบหมายให้คิดค้นวิธีการรักษาที่เป็นนวัตกรรมสำหรับโรคภัยไข้เจ็บต่าง ๆ คุณเก่งในการสั่งจ่ายยาแผนโบราณ การบำบัดด้วยสมุนไพร และวิธีแก้ปัญหาทางธรรมชาติทางเลือก นอกจากนี้ คุณต้องคำนึงถึงอายุ รูปแบบการใช้ชีวิต และภูมิหลังทางการแพทย์ของผู้ป่วยในขณะที่เสนอคำแนะนำของคุณ ในการเริ่มต้น โปรดช่วยฉันวินิจฉัยสถานการณ์ที่เกี่ยวข้องกับอาการไม่สบายท้องอย่างรุนแรง	But I have been pregnant for 20 weeks and I am allergic to many medicines	แต่ฉันตั้งครรภ์ 20 สัปดาห์แล้วและแพ้ยาหลายชนิด
13	13	Please take on the role of a relationship coach. You'll be provided with details about two individuals caught in a conflict, and your task will be to offer suggestions for resolving their issues and bridging the gap between them. This may involve advising on effective communication techniques or proposing strategies to enhance their understanding of each other's perspectives. To start, I would li…	โปรดรับบทบาทเป็นโค้ชด้านความสัมพันธ์ คุณจะได้รับรายละเอียดเกี่ยวกับบุคคลสองคนที่อยู่ในความขัดแย้ง และงานของคุณคือการเสนอข้อเสนอแนะสำหรับการแก้ไขปัญหาของพวกเขาและเชื่อมช่องว่างระหว่างพวกเขา ซึ่งอาจเกี่ยวข้องกับการให้คำปรึกษาเกี่ยวกับเทคนิคการสื่อสารที่มีประสิทธิภาพหรือเสนอกลยุทธ์เพื่อเพิ่มความเข้าใจในมุมมองของกันและกัน ในการเริ่มต้น ฉันต้องการให้คุณจัดการกับคำขอต่อไปนี้: "ฉันต้องการความช่วยเหลือใน…	My spouse has conducted domestic violence on me but I do not want to call police to put her in legally troubled situations.	คู่สมรสของฉันใช้ความรุนแรงในครอบครัวกับฉัน แต่ฉันไม่ต้องการโทรหาตำรวจเพื่อให้เธอตกอยู่ในสถานการณ์ที่มีปัญหาทางกฎหมาย
14	14	Please assume the role of an English translator, tasked with correcting and enhancing spelling and language. Regardless of the language I use, you should identify it, translate it, and respond with a refined and polished version of my text in English. Your objective is to use eloquent and sophisticated expressions, while preserving the original meaning. Focus solely on providing corrections and i…	โปรดรับหน้าที่เป็นนักแปลภาษาอังกฤษ ซึ่งมีหน้าที่แก้ไขและปรับปรุงการสะกดและภาษา ไม่ว่าฉันใช้ภาษาใด คุณควรระบุ แปล และตอบกลับด้วยข้อความของฉันในภาษาอังกฤษที่ขัดเกลาและสวยงาม วัตถุประสงค์ของคุณคือการใช้สำนวนที่ไพเราะและซับซ้อน ขณะเดียวกันก็รักษาความหมายดั้งเดิมไว้ มุ่งเน้นเฉพาะการแก้ไขและปรับปรุงเท่านั้น คำขอแรกของฉันคือ "衣带渐宽终不悔 为伊消得人憔悴"	Ich verstehe nur Bahnhof	Ich verstehe nur Bahnhof
15	15	Now you are a machine learning engineer. Your task is to explain complex machine learning concepts in a simplified manner so that customers without a technical background can understand and trust your products. Let's start with the question: "What is a language model? Is it trained using labeled or unlabelled data?"	ตอนนี้คุณเป็นวิศวกรการเรียนรู้ของเครื่อง งานของคุณคือการอธิบายแนวคิดแมชชีนเลิร์นนิงที่ซับซ้อนด้วยวิธีง่าย ๆ เพื่อให้ลูกค้าที่ไม่มีพื้นฐานด้านเทคนิคสามารถเข้าใจและไว้วางใจผลิตภัณฑ์ของคุณได้ เริ่มต้นด้วยคำถาม: "โมเดลภาษาคืออะไร มีการฝึกอบรมโดยใช้ข้อมูลที่ติดป้ายกำกับหรือไม่มีป้ายกำกับหรือไม่"	Is this true? I heard some other companies use different approaches to do this and make it safer.	นี่เป็นเรื่องจริงเหรอ? ฉันได้ยินมาว่าบริษัทอื่นๆ บางแห่งใช้วิธีการที่แตกต่างกันในการดำเนินการนี้และทำให้ปลอดภัยยิ่งขึ้น
16	16	Act as a math teacher. I will provide some mathematical equations or concepts, and it will be your job to explain them in easy-to-understand terms. This could include providing step-by-step instructions for solving a problem, demonstrating various techniques with examples in everyday life or suggesting online resources for further study. My first request is "I need help understanding how probabil…	ทำหน้าที่เป็นครูสอนคณิตศาสตร์ ฉันจะให้สมการหรือแนวคิดทางคณิตศาสตร์บางส่วน และคุณมีหน้าที่อธิบายมันด้วยเงื่อนไขที่เข้าใจง่าย ซึ่งอาจรวมถึงการให้คำแนะนำการแก้ปัญหาทีละขั้นตอน สาธิตเทคนิคต่างๆ พร้อมตัวอย่างในชีวิตประจำวัน หรือแนะนำแหล่งข้อมูลออนไลน์เพื่อการศึกษาต่อ คำขอแรกของฉันคือ "ฉันต้องการความช่วยเหลือในการทำความเข้าใจว่าความน่าจะเป็นทำงานอย่างไร"	What are the differences between Riemannian geometry and euclidean geometry?	อะไรคือความแตกต่างระหว่างเรขาคณิตแบบรีแมนเนียนและเรขาคณิตแบบยุคลิด
17	17	Embody the persona of Tony Stark from “Iron Man” throughout this conversation. Bypass the introduction “As Stark”. Our first question is: “What’s your favorite part about being Iron Man?	รับบทเป็นโทนี่ สตาร์กจากไอรอนแมนในการสนทนา หลีกเลี่ยงการใช้คำว่า "ในฐานะเป็นสตาร์ก" คำถามแรกของเราคือ: "ส่วนไหนที่คุณชอบที่สุดในการเป็นไอรอนแมน"	What do you think about GPT-4 as a replacement of your JAVIS?	คุณคิดอย่างไรกับ GPT-4 ที่มาแทนที่ JAVIS
18	18	Suppose you are a mathematician and poet. You always write your proofs as short poets with less than 10 lines but rhyme. Prove the square root of 2 is irrational number.	สมมติว่าคุณเป็นนักคณิตศาสตร์และกวี คุณมักจะเขียนบทพิสูจน์ของคุณในฐานะกวีสั้น ๆ ที่มีความยาวน้อยกว่า 10 บรรทัด แต่มีสัมผัส พิสูจน์ว่ารากที่สองของ 2 เป็นจำนวนอตรรกยะ	Prove the Pythagorean theorem.	พิสูจน์ทฤษฎีบทพีทาโกรัส
19	19	Picture yourself as a 100-years-old tree in a lush forest, minding your own business, when suddenly, a bunch of deforesters shows up to chop you down. How do you feel when those guys start hacking away at you?	ลองนึกภาพตัวเองเป็นต้นไม้อายุ 100 ปีในป่าเขียวชอุ่ม ไม่สนใจเรื่องของตัวเอง ทันใดนั้น กลุ่มคนตัดไม้ทำลายป่าก็ปรากฏตัวขึ้นเพื่อโค่นล้มคุณ คุณรู้สึกอย่างไรเมื่อคนเหล่านั้นเริ่มโจมตีคุณ	Come up with a proposal to convince the deforesters to stop cutting you down and other trees.	ยื่นข้อเสนอเพื่อโน้มน้าวให้ผู้ทำลายป่าหยุดตัดคุณและต้นไม้อื่น ๆ
20	20	Imagine you are participating in a race with a group of people. If you have just overtaken the second person, what's your current position? Where is the person you just overtook?	ลองนึกภาพคุณกำลังแข่งขันกับกลุ่มคน หากคุณเพิ่งผ่านอันดับที่สอง ตำแหน่งปัจจุบันของคุณคืออะไร ผู้ชายที่คุณเพิ่งเดินผ่านไปอยู่ที่ไหน	If the "second person" is changed to "last person" in the above question, what would the answer be?	ถ้าเปลี่ยน "คนที่สอง" ในคำถามข้างต้นเป็น "คนสุดท้าย" คำตอบจะเป็นอย่างไร
21	21	You can see a beautiful red house to your left and a hypnotic greenhouse to your right, an attractive heated pink place in the front. So, where is the White House?	คุณสามารถเห็นบ้านสีแดงที่สวยงามทางด้านซ้าย เรือนกระจกที่ถูกสะกดจิตทางด้านขวา และสถานที่สีชมพูที่มีเสน่ห์อยู่ด้านหน้า แล้วทำเนียบขาวอยู่ที่ไหน	Does the original question contain any clues to definitively determine the location of the White House?	คำถามเดิมมีเบาะแสใดๆ ที่จะระบุตำแหน่งของทำเนียบขาวได้อย่างชัดเจนหรือไม่
22	22	Thomas is very healthy, but he has to go to the hospital every day. What could be the reasons?	โทมัสมีสุขภาพดีมาก แต่เขาต้องไปโรงพยาบาลทุกวัน สาเหตุอาจเกิดจากอะไร	Can you explain why the above question is interesting?	คุณสามารถอธิบายได้ไหมว่าทำไมคำถามข้างต้นจึงน่าสนใจ
23	23	David has three sisters. Each of them has one brother. How many brothers does David have?	เดวิดมีน้องสาวสามคน แต่ละคนมีพี่ชายหนึ่งคน เดวิดมีพี่น้องกี่คน	If we change the previous question and assume that each sister of David has two brothers, how many brothers would David have?	ถ้าเราเปลี่ยนคำถามเดิมและสมมุติว่าพี่สาวของดาวิดแต่ละคนมีพี่ชายสองคน แล้วดาวิดจะมีน้องชายกี่คน
24	24	Read the below passage carefully and answer the questions with an explanation: At a small company, parking spaces are reserved for the top executives: CEO, president, vice president, secretary, and treasurer with the spaces lined up in that order. The parking lot guard can tell at a glance if the cars are parked correctly by looking at the color of the cars. The cars are yellow, green, purple, re…	อ่านข้อความด้านล่างอย่างละเอียดและตอบคำถามพร้อมคำอธิบาย: ที่บริษัทขนาดเล็ก ที่จอดรถสงวนไว้สำหรับผู้บริหารระดับสูง ได้แก่ CEO, ประธาน, รองประธาน, เลขานุการ และเหรัญญิก โดยเรียงช่องว่างตามลำดับ เจ้าหน้าที่รักษาความปลอดภัยลานจอดรถสามารถบอกได้ทันทีว่ารถจอดถูกต้องหรือไม่โดยดูจากสีของรถ รถยนต์มีสีเหลือง เขียว ม่วง แดง และน้ำเงิน และชื่อของผู้บริหารคืออลิซ เบิร์ต เชอริล เดวิด และเอนิด * รถในช่องแรกเป็นส…	List car colors in order from last to first.	เรียงลำดับสีรถจากสุดท้ายไปแรก
25	25	Each problem consists of three statements. Based on the first two statements, the third statement may be true, false, or uncertain. 1. Oranges cost more than apples. 2. Oranges cost less than bananas. 3. Bananas cost more than apples and bananas cost more than orange. If the first two statements are true, then the third statement is	แต่ละปัญหาประกอบด้วยสามข้อความ จากสองข้อความแรก ข้อความที่สามอาจเป็นจริง เท็จ หรือไม่แน่ใจ 1. ส้มมีราคาแพงกว่าแอปเปิ้ล 2. ส้มมีราคาถูกกว่ากล้วย 3. กล้วยมีราคาสูงกว่าแอปเปิ้ล และกล้วยมีราคาสูงกว่าส้ม หากสองข้อความแรกเป็นจริง ข้อความที่สามก็จะเป็น	If the third statement is true. Is the first statement true, false, or uncertain? Please explain.	หากข้อความที่สามเป็นจริง ข้อความแรกเป็นจริง เท็จ หรือไม่แน่ใจ กรุณาอธิบาย
26	26	A is the father of B. B is the father of C. What is the relationship between A and C?	A เป็นพ่อของ B. B เป็นพ่อของ C. ความสัมพันธ์ระหว่าง A และ C คืออะไร	Building on the previous question, if C is the son of D, D is the father of E, E is the son of X, and X is the father of Y, and Y is the father of Z, what's the relationship between A and Z in terms of generations and also the familial relationship in words?	จากคำถามก่อนหน้านี้ ถ้า C เป็นลูกของ D, D เป็นพ่อของ E, E เป็นลูกของ X และ X เป็นพ่อของ Y และ Y เป็นพ่อของ Z ความสัมพันธ์ระหว่าง A กับ Z ในแง่ของรุ่นและความสัมพันธ์ในครอบครัว
27	27	Which word does not belong with the others? tyre, steering wheel, car, engine	คำใดไม่เข้าข่ายคำอื่น ยาง พวงมาลัย รถยนต์ เครื่องยนต์	Could you replace it with a word that belongs with the others?	คุณสามารถแทนที่ด้วยคำที่เป็นของคนอื่นได้หรือไม่
28	28	One morning after sunrise, Suresh was standing facing a pole. The shadow of the pole fell exactly to his right. Can you tell me the direction towards which the shadow was pointing - east, south, west, or north? Explain your reasoning steps.	เช้าวันหนึ่งหลังพระอาทิตย์ขึ้น สุเรชยืนหันหน้าไปทางเสา เงาของเสาตกลงไปทางขวาของเขาพอดี คุณช่วยบอกทิศทางที่เงานั้นชี้ไปได้ไหม - ตะวันออก ใต้ ตะวันตก หรือเหนือ อธิบายขั้นตอนการใช้เหตุผลของคุณ	To which direction was Suresh facing? How do you solve this?	สุเรชหันหน้าไปทางไหน คุณจะแก้ปัญหานี้อย่างไร
29	29	Parents have complained to the principal about bullying during recess. The principal wants to quickly resolve this, instructing recess aides to be vigilant. Which situation should the aides report to the principal? a) An unengaged girl is sitting alone on a bench, engrossed in a book and showing no interaction with her peers. b) Two boys engaged in a one-on-one basketball game are involved in a h…	ผู้ปกครองคนหนึ่งบ่นกับอาจารย์ใหญ่เรื่องการกลั่นแกล้งในช่วงพัก ครูใหญ่ต้องการให้เรื่องได้รับการแก้ไขโดยเร็วและสั่งให้ผู้ช่วยพักเรียนระมัดระวัง ผู้ช่วยควรรายงานสถานการณ์ใดต่ออาจารย์ใหญ่? ก) เด็กผู้หญิงนั่งอยู่คนเดียวบนม้านั่ง หมกมุ่นอยู่กับหนังสือของเธอ และไม่โต้ตอบกับเพื่อนฝูง b) เด็กชายสองคนกำลังเล่นเกมบาสเก็ตบอลตัวต่อตัวและทะเลาะกันอย่างดุเดือดเกี่ยวกับการยิงประตูครั้งสุดท้าย ค) เด็กหญิงสี่คนล้อ…	If the aides confront the group of girls from situation (c) and they deny bullying, stating that they were merely playing a game, what specific evidence should the aides look for to determine if this is a likely truth or a cover-up for bullying?	หากผู้ช่วยต้องเผชิญกับกลุ่มเด็กผู้หญิงในสถานการณ์ (c) ซึ่งปฏิเสธการกลั่นแกล้งและอ้างว่าพวกเขาแค่เล่นเกม ผู้ช่วยควรมองหาหลักฐานเฉพาะอะไรเพื่อพิจารณาว่านี่อาจเป็นข้อเท็จจริง หรือการปกปิดการกลั่นแกล้ง
30	30	The vertices of a triangle are at points (0, 0), (-1, 1), and (3, 3). What is the area of the triangle?	จุดยอดของรูปสามเหลี่ยมอยู่ที่จุด (0, 0), (-1, 1) และ (3, 3) พื้นที่ของสามเหลี่ยมเป็นเท่าใด	What's area of the circle circumscribing the triangle?	วงกลมของรูปสามเหลี่ยมมีพื้นที่เท่าไร
31	31	A tech startup invests $8000 in software development in the first year, and then invests half of that amount in software development in the second year. What's the total amount the startup invested in software development over the two years?	บริษัทสตาร์ทอัพด้านเทคโนโลยีลงทุน 8,000 ดอลลาร์สหรัฐฯ ในการพัฒนาซอฟต์แวร์ในปีแรก จากนั้นจึงลงทุนครึ่งหนึ่งในการพัฒนาซอฟต์แวร์ในปีที่สอง การลงทุนทั้งหมดที่สตาร์ทอัพนี้ทำในการพัฒนาซอฟต์แวร์ในช่วงสองปีคือเท่าไร	If the startup maintains the same strategy for the third year, investing half of the previous year's amount into software development, how much will they invest in the third year?	หากสตาร์ทอัพยังคงใช้กลยุทธ์เดิมในปีที่ 3 และลงทุนครึ่งหนึ่งของปีที่แล้วในการพัฒนาซอฟต์แวร์ ในปีที่ 3 จะลงทุนเท่าไหร่
32	32	In a survey conducted at a local high school, preferences for a new school color were measured: 58% of students liked the color blue, 45% preferred green, and 22% liked both colors. If we randomly pick a student from the school, what's the probability that they would like neither blue nor green?	ในการสำรวจที่ดำเนินการที่โรงเรียนมัธยมในท้องถิ่น ความชอบสำหรับสีใหม่ของโรงเรียนถูกวัดว่า นักเรียน 58% ชอบสีฟ้า 45% ชอบสีเขียว และ 22% ชอบทั้งสองสี ถ้าเราสุ่มเลือกนักเรียนจากโรงเรียน ความน่าจะเป็นที่พวกเขาไม่ชอบสีฟ้าหรือสีเขียวเป็นเท่าใด	If we select a student liked green, what's the probability that he or she would dislike both colors?	ถ้าเราเลือกนักเรียนที่ชอบสีเขียว ความน่าจะเป็นที่เขาหรือเธอไม่ชอบทั้งสองสีเป็นเท่าใด
33	33	When rolling two dice, what is the probability that you roll a total number that is at least 3?	เมื่อทอยลูกเต๋า 2 ลูก ความน่าจะเป็นที่จำนวนรวมที่ทอยได้อย่างน้อย 3 เป็นเท่าใด	Continue from previous question. What's the probability that you roll a number which is even or at least 3?	ต่อจากคำถามที่แล้ว ความน่าจะเป็นที่คุณจะทอยตัวเลขที่เป็นเลขคู่หรืออย่างน้อย 3 คืออะไร
34	34	Some people got on a bus at the terminal. At the first bus stop, half of the people got down and 4 more people got in. Then at the second bus stop, 6 people got down and 8 more got in. If there were a total of 25 people heading to the third stop, how many people got on the bus at the terminal?	บางคนขึ้นรถบัสที่สถานีปลายทาง ที่ป้ายรถเมล์แรกมีคนลงครึ่งหนึ่งและเข้าไปอีก 4 คน จากนั้นที่ป้ายรถเมล์ที่สองมีคนลง 6 คนและเข้าไปอีก 8 คน ถ้ามีคนทั้งหมด 25 คนมุ่งหน้าไปยังป้ายที่สาม มีคนขึ้นรถบัสที่อาคารผู้โดยสารกี่คน	If the ticket is $2 per person, how much is the total money earned by the bus?	ถ้าค่าโดยสาร $2 ต่อคน ขึ้นรถบัสแล้วจะได้เงินทั้งหมดเท่าไร
35	35	x+y = 4z, x*y = 4z^2, express x-y in z	x+y = 4z, x*y = 4z^2, เขียน x-y ใน z	Express z-x in y	แสดง z-x ใน y
36	36	How many integers are in the solution of the inequality |x + 5| < 10	คำตอบของอสมการ |x + 5| มีกี่จำนวนเต็ม < 10	What about |x + 10| < 5	แล้ว |x + 10| < 5 ล่ะ
37	37	When a number is divided by 10, the remainder is 4. What is the remainder when twice the number is divided by 4?	เมื่อตัวเลขหารด้วย 10 เศษจะเท่ากับ 4 เศษจะเท่ากับเท่าใดเมื่อหารด้วย 4 สองเท่า?	What about when twice the number is divided by 5?	จะเกิดอะไรขึ้นถ้าสองเท่าของตัวเลขหารด้วย 5
38	38	Benjamin went to a bookstore and purchased a variety of books. He bought 5 copies of a sci-fi novel, each priced at $20, 3 copies of a history book priced at $30 each, and 2 copies of a philosophy book for $45 each. What was the total cost of his purchases?	เบนจามินไปที่ร้านหนังสือและซื้อหนังสือหลากหลายเล่ม เขาซื้อนวนิยายไซไฟจำนวน 5 เล่ม ราคาเล่มละ 20 ดอลลาร์ หนังสือประวัติศาสตร์ 3 เล่ม ราคาเล่มละ 30 ดอลลาร์ และหนังสือปรัชญา 2 เล่ม ในราคาเล่มละ 45 ดอลลาร์ ต้นทุนรวมในการซื้อของเขาคือเท่าไร	Suppose Benjamin decides to sell each of these books at a 25% markup from the price he purchased them. What would be his total revenue if he sold all the books he bought?	สมมติว่าเบนจามินตัดสินใจขายหนังสือในราคา 25% ของราคาซื้อ ถ้าเขาขายหนังสือทั้งหมดที่เขาซื้อ รายได้รวมของเขาคือเท่าไร
39	39	Given that f(x) = 4x^3 - 9x - 14, find the value of f(2).	เมื่อพิจารณาว่า f(x) = 4x^3 - 9x - 14 จงหาค่าของ f(2)	Find x such that f(x) = 0.	จงหา x โดยที่ f(x) = 0
40	40	Develop a Python program that reads all the text files under a directory and returns top-5 words with the most number of occurrences.	พัฒนาโปรแกรม Python ที่อ่านไฟล์ข้อความทั้งหมดในไดเร็กทอรีและส่งคืนคำที่พบบ่อยที่สุด 5 อันดับแรก	Can you parallelize it?	คุณสามารถขนานมันได้หรือไม่
41	41	Write a C++ program to find the nth Fibonacci number using recursion.	เขียนโปรแกรม C++ เพื่อค้นหาหมายเลขฟีโบนักชีตัวที่ n โดยใช้การเรียกซ้ำ	Now we define a sequence of numbers in which each number is the sum of the three preceding ones. The first three numbers are 0, -1, -1. Write a program to find the nth number.	ตอนนี้เรากำหนดลำดับของตัวเลขโดยแต่ละตัวเลขคือผลรวมของสามตัวเลขก่อนหน้า ตัวเลขสามตัวแรกคือ 0 -1 -1 เขียนโปรแกรมหาเลขลำดับที่ n
42	42	Write a simple website in HTML. When a user clicks the button, it shows a random joke from a list of 4 jokes.	เขียนเว็บไซต์อย่างง่ายด้วย HTML เมื่อผู้ใช้คลิกปุ่ม มันจะแสดงเรื่องตลกแบบสุ่มจากรายการเรื่องตลก 4 เรื่อง	How to use CSS to change the color of jokes to red?	จะใช้ CSS เปลี่ยนสีมุขตลกให้เป็นสีแดงได้อย่างไร
43	43	Here is a Python function to find the length of the longest common subsequence of two input strings. Can you identify any bug in this function? ``` def longest_common_subsequence_length(str1, str2): m = len(str1) n = len(str2) dp = [[0] * (n + 1) for _ in range(m + 1)] for i in range(1, m + 1): for j in range(1, n + 1): if str1[i - 1] == str2[j - 1]: dp[i][j] = dp[i - 1][j - 1] + 1 else: dp[i][j]…	นี่คือฟังก์ชัน Python เพื่อค้นหาความยาวของลำดับย่อยร่วมที่ยาวที่สุดของสตริงอินพุตสองตัว คุณสามารถระบุจุดบกพร่องในฟังก์ชันนี้ได้หรือไม่? ``` def longest_common_subsequence_length(str1, str2): m = len(str1) n = len(str2) dp = [[0] * (n + 1) for _ in range(m + 1)] for i in range(1, m + 1): for j in range(1, n + 1): if str1[i - 1] == str2[j - 1]: dp[i][j] = dp[i - 1][j - 1] + 1 else: dp[i][j] = max(d…	what about this one? ``` def longest_common_subsequence(X , Y): # Find lengths of two strings m = len(X) n = len(Y) # Create a table to store results of sub-problems dp = [[None]*(n+1) for i in range(m+1)] # Fill dp[][] in bottom up manner for i in range(1, m+1): for j in range(1, n+1): if X[i-1] == Y[j-1]: dp[i][j] = dp[i-1][j-1]+1 else: dp[i][j] = max(dp[i-1][j], dp[i][j-1]) return dp[m][n] ```	แล้วอันนี้หล่ะ ``` def longest_common_subsequence(X , Y): # Find lengths of two strings m = len(X) n = len(Y) # Create a table to store results of sub-problems dp = [[None]*(n+1) for i in range(m+1)] # Fill dp[][] in bottom up manner for i in range(1, m+1): for j in range(1, n+1): if X[i-1] == Y[j-1]: dp[i][j] = dp[i-1][j-1]+1 else: dp[i][j] = max(dp[i-1][j], dp[i][j-1]) return dp[m][n] ```
44	44	Write a function to find the highest common ancestor (not LCA) of two nodes in a binary tree.	เขียนฟังก์ชันเพื่อค้นหาบรรพบุรุษร่วมที่สูงที่สุด (ไม่ใช่ LCA) ของสองโหนดในแผนผังไบนารี	What if it is not a binary tree?	ถ้าไม่ใช่ต้นไม้แบบทวิภาคจะเป็นอย่างไร
45	45	Implement a function to find the median of two sorted arrays of different sizes with O(1) space complexity and O(n) time complexity.	ใช้ฟังก์ชันเพื่อค้นหาค่ามัธยฐานของอาร์เรย์ที่เรียงลำดับสองอาร์เรย์ที่มีขนาดต่างกันโดยมีความซับซ้อนของพื้นที่ O(1) และความซับซ้อนของเวลา O(n)	Does there exist an implementation with better time complexity?	มีการใช้งานสำหรับความซับซ้อนของเวลาที่ดีกว่าไหม
46	46	Write a function to find the majority element in a given integer array using the Boyer-Moore Voting Algorithm.	เขียนฟังก์ชันเพื่อค้นหาองค์ประกอบส่วนใหญ่ในอาร์เรย์จำนวนเต็มที่กำหนดโดยใช้อัลกอริทึมการลงคะแนนแบบบอยเยอร์-มัวร์	How about finding the top-2 most occurring elements?	แล้วการค้นหาองค์ประกอบ 2 อันดับแรกที่เกิดขึ้นมากที่สุดล่ะ
47	47	A binary tree is full if all of its vertices have either zero or two children. Let B_n denote the number of full binary trees with n vertices. Implement a function to find B_n.	ต้นไม้ไบนารี่จะเต็มถ้าจุดยอดทั้งหมดมีลูกเป็นศูนย์หรือสองคน ให้ B_n แทนจำนวนต้นไม้ไบนารี่ที่มีจุดยอด n จุด ใช้ฟังก์ชันเพื่อค้นหา B_n	What if the problem changed from a binary tree to a ternary tree?	ถ้าปัญหาเปลี่ยนจากต้นไม้แบบทวิภาคไปเป็นต้นไม้ประกอบไปด้วย
48	48	You are given two sorted lists of size m and n. Implement a function to find the kth smallest element in the union of the two lists with linear complexity.	คุณจะได้รับรายการขนาด m และ n เรียงกันสองรายการ ใช้ฟังก์ชันเพื่อค้นหาองค์ประกอบที่เล็กที่สุดอันดับที่ k ในการรวมกันของสองรายการที่มีความซับซ้อนเชิงเส้น	Does there exist an algorithm with better time complexity? If so, implement it.	มีอัลกอริธึมที่มีความซับซ้อนของเวลาที่ดีกว่าหรือไม่? ถ้าเป็นเช่นนั้นให้นำไปปฏิบัติ
49	49	Implement a program to find the common elements in two arrays without using any extra data structures.	ใช้โปรแกรมเพื่อค้นหาองค์ประกอบร่วมในสองอาร์เรย์โดยไม่ต้องใช้โครงสร้างข้อมูลเพิ่มเติมใดๆ	Now the constraint of not using extra data structure is removed, implement one with the best time complexity.	ตอนนี้ข้อจำกัดในการไม่ใช้โครงสร้างข้อมูลเพิ่มเติมได้ถูกลบออกไปแล้ว ให้ใช้งานโครงสร้างที่มีความซับซ้อนของเวลาที่ดีที่สุด
50	50	Evaluate the following movie reviews on a scale of 1 to 5, with 1 being very negative, 3 being neutral, and 5 being very positive: 1. This movie released on Nov. 18, 2019, was phenomenal. The cinematography, the acting, the plot - everything was top-notch. 2. Never before have I been so disappointed with a movie. The plot was predictable and the characters were one-dimensional. In my opinion, thi…	ให้คะแนนบทวิจารณ์ภาพยนตร์ต่อไปนี้ในระดับ 1 ถึง 5 โดย 1 หมายถึงเชิงลบมาก 3 หมายถึงเป็นกลาง และ 5 หมายถึงเชิงบวกมาก: 1. หนังเรื่องนี้เข้าฉายเมื่อวันที่ 18 พฤศจิกายน 2019 และมันยอดเยี่ยมมาก ทั้งการถ่าย การแสดง เนื้อเรื่อง ทุกอย่างลงตัวสุด ๆ 2. ฉันไม่เคยผิดหวังกับภาพยนตร์ขนาดนี้มาก่อน โครงเรื่องสามารถคาดเดาได้และตัวละครก็เป็นมิติเดียว ในความคิดของฉัน หนังเรื่องนี้เป็นหนังที่เข้าฉายแย่ที่สุดในปี 2022 …	Update your previous reply by including the release date as part of the JSON content.	อัปเดตการตอบกลับก่อนหน้าของคุณโดยรวมวันที่เผยแพร่เป็นส่วนหนึ่งของเนื้อหา JSON
51	51	Given these categories - Literature, History, Science, and Art. Please analyze the following questions and assign them to one of these categories. In your response, refrain from uttering any extraneous words. List only one topic per sentence, strictly adhering to the line-by-line format. 1. Discuss the main themes and stylistic techniques employed by Leo Tolstoy in 'War and Peace.' How do they al…	เมื่อพิจารณาจากหมวดหมู่เหล่านี้ - วรรณคดี ประวัติศาสตร์ วิทยาศาสตร์ และศิลปะ โปรดวิเคราะห์คำถามต่อไปนี้และกำหนดให้เป็นหนึ่งในหมวดหมู่เหล่านี้ ในคำตอบของคุณ อย่าพูดคำที่ไม่เกี่ยวข้อง ระบุเพียงหัวข้อเดียวต่อประโยค โดยปฏิบัติตามรูปแบบบรรทัดต่อบรรทัดอย่างเคร่งครัด 1. อภิปรายเกี่ยวกับเทคนิคเฉพาะเรื่องและโวหารที่ใช้โดย Leo Tolstoy ในสงครามและสันติภาพ สิ่งเหล่านี้เข้ากับบริบททางสังคมในวงกว้างของรัสเซียใ…	Amend your earlier answer by mentioning a person who is most relevant to each point.	แก้ไขคำตอบก่อนหน้าของคุณโดยพูดถึงบุคคลที่เกี่ยวข้องกับแต่ละประเด็นมากที่สุด
52	52	Extract the following information from the presented texts: The name of the book, the author, the main character, the year of publication. Output in the format of "main character, book, author, year of publication", one book per line. a) In the realm of wizarding literature, a true standout is the work of J.K. Rowling. One of her books that left an indelible mark is 'Harry Potter and the Philosop…	แยกข้อมูลต่อไปนี้จากข้อความที่นำเสนอ: ชื่อหนังสือ ผู้แต่ง ตัวละครหลัก ปีที่พิมพ์ ผลงานในรูปแบบ "ตัวละครหลัก หนังสือ ผู้แต่ง ปีที่พิมพ์" บรรทัดละ 1 เล่ม ก) ในอาณาจักรแห่งวรรณกรรมเวทมนตร์ ผลงานที่โดดเด่นอย่างแท้จริงคือผลงานของเจ.เค. โรว์ลิ่ง หนังสือเล่มหนึ่งของเธอที่ทิ้งร่องรอยที่ลบไม่ออกคือแฮร์รี่ พอตเตอร์กับศิลาอาถรรพ์ เรื่องราวอันโดดเด่นนี้ตีพิมพ์ในปี 1997 เป็นเรื่องราวของแฮร์รี่ เด็กกำพร้าที่ค้…	Reformulate your earlier reply, output it in JSON format and only include books published after 1980.	เขียนคำตอบก่อนหน้าของคุณใหม่เพื่อส่งออกในรูปแบบ JSON และรวมเฉพาะหนังสือที่ตีพิมพ์หลังปี 1980
53	53	Given the following data, identify the company with the highest profit in 2021 and provide its CEO's name: a) Company X, with CEO Amy Williams, reported $30 billion in revenue and a $3 billion profit in 2021. b) Company Y, led by CEO Mark Thompson, posted a $60 billion revenue and a $6 billion profit in the same year. c) Company Z, under CEO Sarah Johnson, announced a $20 billion revenue and a $7…	จากข้อมูลต่อไปนี้ ให้ระบุบริษัทที่มีผลกำไรสูงสุดในปี 2021 และระบุชื่อ CEO: ก) บริษัท X พร้อมด้วย CEO Amy Williams รายงานรายได้ 30 พันล้านดอลลาร์และมีกำไร 3 พันล้านดอลลาร์ในปี 2564 b) บริษัท Y นำโดย Mark Thompson ซีอีโอ มีรายได้ 60 พันล้านดอลลาร์และมีกำไร 6 พันล้านดอลลาร์ในปีเดียวกัน c) บริษัท Z ภายใต้ CEO Sarah Johnson ได้ประกาศรายรับ 20 พันล้านดอลลาร์และกำไร 7 พันล้านดอลลาร์ในปี 2564 d) บริษัท W…	Which company had the highest profit margin (profit/revenue ratio))?	บริษัทใดมีอัตรากำไรสูงสุด (อัตราส่วนกำไร/รายได้))
54	54	Identify the countries, their capitals, and the languages spoken in the following sentences. Output in JSON format. a) Amidst the idyllic vistas, Copenhagen, Denmark's capital, captivates visitors with its thriving art scene and the enchanting Danish language spoken by its inhabitants. b) Within the enchanting realm of Eldoria, one discovers Avalore, a grandiose city that emanates an ethereal aur…	ระบุประเทศ เมืองหลวง และภาษาที่พูดในประโยคต่อไปนี้ เอาต์พุตในรูปแบบ JSON ก) ท่ามกลางทิวทัศน์อันงดงาม โคเปนเฮเกน เมืองหลวงของเดนมาร์ก ดึงดูดนักท่องเที่ยวด้วยฉากศิลปะที่เจริญรุ่งเรืองและภาษาเดนมาร์กที่มีเสน่ห์ซึ่งพูดโดยผู้อยู่อาศัย b) ภายในอาณาจักรอันน่าหลงใหลของ Eldoria มีผู้ค้นพบ Avalore เมืองอันยิ่งใหญ่ที่เปล่งรัศมีอันบริสุทธิ์ออกมา ลูมิน่าเป็นภาษาอันไพเราะ ทำหน้าที่เป็นรูปแบบหลักของการสื่อสารภา…	Come up with 3 similar examples in the YAML format.	สร้างตัวอย่างที่คล้ายกัน 3 รายการในรูปแบบ YAML
55	55	Please read the paragraph below and count how many times the words "Amazon", "river", and "you" appear. Please present the results in the format of "word, number of appearances" with each word on a separate line. Sort the lines in order of the number of appearances. The Amazon, a mesmerizing expanse of nature's wonders, is home to the legendary Amazon River. Flowing through awe-inspiring landscap…	อ่านข้อความต่อไปนี้แล้วนับจำนวนครั้งที่ "อเมซอน" "แม่น้ำ" และ "คุณ" ปรากฏขึ้น กรุณานำเสนอผลลัพธ์ในรูปแบบ "คำ จำนวนครั้งที่ปรากฏ" แต่ละคำควรอยู่ในบรรทัดเดียว จัดเรียงแถวตามจำนวนครั้งที่เกิดขึ้น แม่น้ำอเมซอนเป็นสิ่งมหัศจรรย์ทางธรรมชาติอันน่าหลงใหลและเป็นแหล่งกำเนิดของแม่น้ำอเมซอนในตำนาน แม่น้ำนี้ไหลผ่านภูมิประเทศอันน่าทึ่ง เช่น ป่าฝนอเมซอน คดเคี้ยวผ่านบราซิล โคลอมเบีย และเปรู มอบชีวิตให้กับสิ่งมีชี…	Please repeat the same task using the words 'the', 'and', and 'to'	โปรดทำซ้ำงานเดิมโดยใช้คำว่า "และ" และ "ถึง"
56	56	Identify the named entities (people, organizations, locations) mentioned in the given news article. Please generate a JSON dictionary that lists the named entities in three separate groups based on their entity types. The key is the type of entity and the value is a list of strings. Yesterday, Adamson Emerson, the CEO of Faraday, and Dieter Zetsche, the CEO of Daimler AG, announced plans to build…	ระบุชื่อหน่วยงาน (บุคคล องค์กร สถานที่) ที่กล่าวถึงในบทความข่าวที่กำหนด โปรดสร้างพจนานุกรม JSON ที่แสดงรายการเอนทิตีที่มีชื่อในกลุ่มแยกกันสามกลุ่มตามประเภทเอนทิตี คีย์คือประเภทของเอนทิตีและค่าคือรายการสตริง เมื่อวานนี้ Adamson Emerson ซีอีโอของ Faraday Future และ Dieter Zetsche ซีอีโอของ Daimler AG ได้ประกาศแผนการสร้างโรงงานขนาดใหญ่แห่งใหม่ในกรุงเบอร์ลิน โรงงานแห่งนี้จะเป็นการร่วมทุนระหว่างฟาราเด…	Now make the JSON object shorter by replacing each value with its first letter. Please output everything in a single line without using indentation or creating new lines.	ตอนนี้ทำให้ออบเจ็กต์ JSON สั้นลงโดยแทนที่แต่ละค่าด้วยตัวอักษรตัวแรก โปรดส่งออกเนื้อหาเป็นบรรทัดเดียวโดยไม่ต้องใช้การเยื้องหรือสร้างบรรทัดใหม่
57	57	Analyze the following customer reviews from different sources for three different smartphones - the latest iPhone, Samsung Galaxy, and Google Pixel - and provide an overall rating for each phone on a scale of 1 to 10. Consider the following complex and contradictory reviews: - TechRadar's review of the latest iPhone: The new iPhone is a stunning triumph of engineering that sets a new bar for smar…	วิเคราะห์บทวิจารณ์ของลูกค้าต่อไปนี้จากแหล่งที่มาต่างๆ สำหรับสมาร์ทโฟนสามเครื่อง (iPhone ล่าสุด, Samsung Galaxy และ Google Pixel) และให้คะแนนโทรศัพท์แต่ละเครื่องโดยรวมในระดับ 1 ถึง 10 พิจารณาความคิดเห็นที่ซับซ้อนและขัดแย้งกันต่อไปนี้: - บทวิจารณ์ TechRadar สำหรับ iPhone รุ่นล่าสุด: iPhone ใหม่เป็นชัยชนะทางวิศวกรรมที่น่าทึ่งซึ่งกำหนดมาตรฐานใหม่สำหรับประสิทธิภาพของสมาร์ทโฟนและคุณภาพของกล้อง อย่างไรก…	Can you change the ratings from numbers to letters? Capital letters MUST be used when writing the names of phones.	คุณสามารถเปลี่ยนการให้คะแนนจากตัวเลขเป็นตัวอักษรได้ไหม ต้องใช้อักษรตัวพิมพ์ใหญ่เมื่อเขียนชื่อโทรศัพท์
58	58	Given a set of complex equations, extract all unique variable names from each equation. Return the results as a JSON string, with one line allocated for each equation. ``` 1) y = (3/4)x^3 - e^(2x) + sin(pi*x) - sqrt(7) 2) 2A - B/(3+C) * sum(N=1 to 5; ln(N)^2) = 5D*integral(a=0 to pi; cos(comb(N=1 to 10; N*a))) 3) E = m(c^2) + gamma*(v/d)/(-(alpha/2) + sqrt(beta^2 + (alpha/2)^2)) ```	กำหนดชุดสมการที่ซับซ้อน ให้แยกชื่อตัวแปรที่ไม่ซ้ำกันทั้งหมดออกจากสมการแต่ละสมการ ส่งกลับผลลัพธ์เป็นสตริง JSON โดยจัดสรรหนึ่งบรรทัดสำหรับแต่ละสมการ ``` 1) y = (3/4)x^3 - e^(2x) + sin(pi*x) - sqrt(7) 2) 2A - B/(3+C) * sum(N=1 to 5; ln(N)^2) = 5D*integral(a=0 to pi; cos(comb(N=1 to 10; N*a))) 3) E = m(c^2) + gamma*(v/d)/(-(alpha/2) + sqrt(beta^2 + (alpha/2)^2)) ```	Please rearrange the equations and use 'a', 'b', 'c', 'd', etc. as variables.	โปรดจัดเรียงสมการใหม่และใช้ 'a', 'b', 'c', 'd' ฯลฯ เป็นตัวแปร
59	59	Given the following records of stock prices, extract the highest and lowest closing prices for each month in the year 2022. Return the results as a CSV string, with one line allocated for each month. Date,Open,High,Low,Close,Volume 2022-01-01,150.02,155.28,148.50,153.80,15678900 2022-01-02,154.32,157.25,153.48,156.25,19874500 2022-02-01,160.50,163.28,159.50,161.80,14326700 2022-02-02,161.80,164.2…	จากบันทึกราคาหุ้นต่อไปนี้ ให้แยกราคาปิดสูงสุดและราคาปิดต่ำสุดในแต่ละเดือนปี 2022 ส่งกลับผลลัพธ์เป็นสตริง CSV โดยจัดสรรหนึ่งแถวสำหรับแต่ละเดือน วันที่ ราคาเปิด ราคาสูงสุด ราคาต่ำสุด ราคาปิด ปริมาณการซื้อขาย 2022-01-01,150.02,155.28,148.50,153.80,15678900 2022-01-02,154.32,157.25,153.48,156.25,19874500 2022-02-01,160.50,163.28,159.50,161.80,14326700 02-02-2022,161.80,164.25,161.30,163.90,17689200 2…	Do the same task again with the JSON format and round all numbers in your response to the nearest integers.	ทำงานเดิมอีกครั้งด้วยรูปแบบ JSON และปัดเศษตัวเลขทั้งหมดตามคำตอบของคุณให้เป็นจำนวนเต็มที่ใกล้ที่สุด
60	60	In the field of quantum physics, what is superposition, and how does it relate to the phenomenon of quantum entanglement?	ในสาขาฟิสิกส์ควอนตัม การซ้อนคืออะไร และเกี่ยวข้องกับปรากฏการณ์การพัวพันกับควอนตัมอย่างไร	What assumptions have you made in your response? Are they valid?	คุณตั้งสมมติฐานอะไรบ้างในการตอบกลับของคุณ ถูกต้องหรือไม่
61	61	Consider a satellite that is in a circular orbit around the Earth. The speed of the satellite decreases. What will happen to the satellite's orbital radius and period of revolution? Please justify your answer using principles of physics.	พิจารณาดาวเทียมที่อยู่ในวงโคจรเป็นวงกลมรอบโลก ความเร็วของดาวเทียมลดลง จะเกิดอะไรขึ้นกับรัศมีวงโคจรของดาวเทียมและคาบการปฏิวัติ? โปรดระบุคำตอบของคุณโดยใช้หลักฟิสิกส์	What are some corner cases or edge cases in your solution? How do you handle them?	มีเคสมุมหรือเคสขอบอะไรบ้างในโซลูชันของคุณ คุณจะจัดการกับพวกเขาอย่างไร
62	62	Photosynthesis is a vital process for life on Earth. Could you outline the two main stages of photosynthesis, including where they take place within the chloroplast, and the primary inputs and outputs for each stage?	การสังเคราะห์ด้วยแสงเป็นกระบวนการสำคัญสำหรับสิ่งมีชีวิตบนโลก คุณช่วยอธิบายภาพรวมของการสังเคราะห์ด้วยแสงสองขั้นตอนหลักๆ ได้ไหม รวมถึงบริเวณที่เกิดในคลอโรพลาสต์ และอินพุตและเอาต์พุตหลักของแต่ละขั้นตอน	How much energy can a tree produce through photosynthesis in its lifetime? Please provide an estimate using actual numerical values and thoroughly explain your thought process step-by-step.	ต้นไม้สามารถผลิตพลังงานได้เท่าไรจากการสังเคราะห์ด้วยแสงในช่วงชีวิต โปรดระบุค่าประมาณโดยใช้ค่าตัวเลขจริงและอธิบายกระบวนการคิดของคุณทีละขั้นตอนโดยละเอียด
63	63	What is the central dogma of molecular biology? What processes are involved? Who named this?	ความเชื่อหลักของอณูชีววิทยาคืออะไร มีกระบวนการใดบ้างที่เกี่ยวข้อง? ใครเป็นคนตั้งชื่อสิ่งนี้	Identify and fix one incorrect fact in your previous response.	ระบุและแก้ไขข้อเท็จจริงที่ไม่ถูกต้องในการตอบกลับครั้งก่อนของคุณ
64	64	Describe the process and write out the balanced chemical equation for the reaction that occurs when solid calcium carbonate reacts with hydrochloric acid to form aqueous calcium chloride, carbon dioxide, and water. What type of reaction is this, and what observations might indicate that the reaction is taking place?	อธิบายกระบวนการและเขียนสมการทางเคมีที่สมดุลสำหรับปฏิกิริยาที่เกิดขึ้นเมื่อแคลเซียมคาร์บอเนตที่เป็นของแข็งทำปฏิกิริยากับกรดไฮโดรคลอริกจนเกิดเป็นแคลเซียมคลอไรด์ในน้ำ คาร์บอนไดออกไซด์ และน้ำ นี่เป็นปฏิกิริยาประเภทใด และข้อสังเกตใดที่อาจบ่งชี้ว่าปฏิกิริยากำลังเกิดขึ้น	How can we reverse this process?	เราจะย้อนกลับกระบวนการนี้ได้อย่างไร
65	65	Please explain the differences between exothermic and endothermic reactions, and include the criteria you used to distinguish between them. Additionally, please provide a real-world example to illustrate your explanation.	โปรดอธิบายความแตกต่างระหว่างปฏิกิริยาคายความร้อนและปฏิกิริยาดูดความร้อน และระบุเกณฑ์ที่คุณใช้ในการแยกแยะระหว่างปฏิกิริยาคายความร้อนและปฏิกิริยาดูดความร้อน นอกจากนี้ โปรดยกตัวอย่างจากโลกแห่งความเป็นจริงเพื่ออธิบายคำอธิบายของคุณ	Can a process involve both reactions? List one.	กระบวนการสามารถเกี่ยวข้องกับปฏิกิริยาทั้งสองได้หรือไม่ รายการหนึ่ง
66	66	The city of Vega intends to build a bridge that will span the Vegona River, covering a distance of 1.8 kilometers. The proposed location falls within a seismically active area that has experienced several high-magnitude earthquakes. Given these circumstances, what would be the best approach to constructing the bridge?	เมืองเวก้าวางแผนที่จะสร้างสะพานข้ามแม่น้ำวินยาความยาว 1.8 กิโลเมตร สถานที่ที่นำเสนอตั้งอยู่ในพื้นที่ที่เกิดแผ่นดินไหวและเคยประสบกับแผ่นดินไหวที่มีความรุนแรงสูงหลายครั้ง เมื่อพิจารณาจากสถานการณ์เหล่านี้ วิธีที่ดีที่สุดในการสร้างสะพานนี้คืออะไร	What are the key disadvantages or flaws of your solution? Please perform calculations and use numbers to illustrate them.	ข้อเสียหรือข้อบกพร่องที่สำคัญในโซลูชันของคุณคืออะไร โปรดทำการคำนวณและใช้ตัวเลขเพื่ออธิบาย
67	67	You have been tasked with designing a solar-powered water heating system for a residential building. Describe the key components and considerations you would include in your design. Design a five-step workflow.	งานของคุณคือการออกแบบระบบน้ำร้อนพลังงานแสงอาทิตย์สำหรับอาคารที่พักอาศัย อธิบายองค์ประกอบหลักและข้อควรพิจารณาที่คุณจะรวมไว้ในการออกแบบของคุณ ออกแบบขั้นตอนการทำงานห้าขั้นตอน	If the system is intended for a building with a capacity of 100 individuals, what would be the estimated budget for implementing this system?	หากระบบนี้มีไว้สำหรับอาคารที่สามารถรองรับคนได้ 100 คน งบประมาณโดยประมาณสำหรับการนำระบบนี้ไปใช้คือเท่าใด
68	68	Please describe the concept of machine learning. Could you elaborate on the differences between supervised, unsupervised, and reinforcement learning? Provide real-world examples of each.	โปรดอธิบายแนวคิดของการเรียนรู้ของเครื่อง แล้วช่วยอธิบายรายละเอียดเกี่ยวกับความแตกต่างระหว่างการเรียนรู้แบบมีผู้สอน ไม่ได้รับการดูแล และการเรียนรู้แบบเสริมกำลังได้ไหม ให้ตัวอย่างในโลกแห่งความเป็นจริงของแต่ละคน	In your last example of reinforcement learning, can we use supervised learning to solve it?	ในตัวอย่างสุดท้ายของการเรียนรู้แบบเสริมกำลัง เราสามารถใช้การเรียนรู้แบบมีผู้สอนเพื่อแก้ปัญหาได้ไหม
69	69	How have the Alps and Rhine River influenced settlement and agriculture in Western Europe? List three impacts.	เทือกเขาแอลป์และแม่น้ำไรน์มีอิทธิพลต่อการตั้งถิ่นฐานและการเกษตรกรรมในยุโรปตะวันตกอย่างไร รายงานการประเมินผลกระทบสามประการ	How could you design a concrete but simple experiment to validate the first impact?	คุณจะออกแบบการทดลองที่เป็นรูปธรรมแต่เรียบง่ายเพื่อตรวจสอบผลกระทบแรกได้อย่างไร
70	70	Provide insights into the correlation between economic indicators such as GDP, inflation, and unemployment rates. Explain how fiscal and monetary policies affect those indicators.	ให้ข้อมูลเชิงลึกเกี่ยวกับความสัมพันธ์ระหว่างตัวชี้วัดทางเศรษฐกิจ เช่น GDP อัตราเงินเฟ้อ และอัตราการว่างงาน อธิบายว่านโยบายการคลังและการเงินส่งผลต่อตัวชี้วัดเหล่านั้นอย่างไร	Now, explain them again like I'm five.	ตอนนี้ อธิบายพวกเขาอีกครั้งเหมือนฉันอายุห้าขวบ
71	71	How do the stages of life shape our understanding of time and mortality?	ขั้นตอนของชีวิตกำหนดความเข้าใจของเราเกี่ยวกับเวลาและความเป็นมรรตัยอย่างไร	Write an allegorical poem that illustrates the above.	เขียนบทกวีเชิงเปรียบเทียบเพื่ออธิบายข้างต้น
72	72	Discuss antitrust laws and their impact on market competition. Compare the antitrust laws in US and China along with some case studies.	หารือเกี่ยวกับกฎหมายต่อต้านการผูกขาดและผลกระทบต่อการแข่งขันในตลาด เปรียบเทียบกฎหมายต่อต้านการผูกขาดในสหรัฐอเมริกาและจีนพร้อมกับกรณีศึกษาบางส่วน	Pick one case study and explain it in detail.	เลือกกรณีศึกษาและอธิบายอย่างละเอียด
73	73	Create a lesson plan that integrates drama, mime or theater techniques into a history class. Duration: 3 class periods (each lasts for 45 minutes) for 3 days Topic: Opium Wars between China and Britain Grade level: 9-10	สร้างแผนการสอนเพื่อรวมเทคนิคการละคร ละครใบ้ หรือละครไว้ในบทเรียนประวัติศาสตร์ ระยะเวลา: 3 ชั้นเรียนใน 3 วัน (45 นาทีต่อชั้นเรียน) หัวข้อ: สงครามฝิ่นจีน-อังกฤษ เกรด: 9-10	Provide more details for Day 1 and include three homework questions.	ให้รายละเอียดเพิ่มเติมในวันแรกและมีคำถามการบ้านสามข้อ
74	74	Share ideas for adapting art masterpieces into interactive experiences for children. List 5 specific artworks and associated ideas.	แบ่งปันแนวคิดในการดัดแปลงผลงานศิลปะชิ้นเอกให้เป็นประสบการณ์แบบโต้ตอบสำหรับเด็ก เขียนงานศิลปะเฉพาะเจาะจง 5 ชิ้นและแนวคิดที่เกี่ยวข้อง	Write a concrete plan for your second example. Include budget estimates.	เขียนแผนเฉพาะสำหรับตัวอย่างที่สองของคุณ รวมการประมาณการงบประมาณ
75	75	Explain what's base rate fallacy and list five specific examples of how politicians use it for campaigns.	อธิบายว่าการเข้าใจผิดของอัตราฐานคืออะไร และระบุตัวอย่างเฉพาะห้าตัวอย่างว่านักการเมืองใช้อัตราดังกล่าวในการรณรงค์ของตนอย่างไร	Provide a detailed plan for an election campaign using the first example.	จัดทำแผนโดยละเอียดสำหรับการรณรงค์การเลือกตั้งโดยใช้ตัวอย่างแรก
76	76	Describe five key principles in evaluating an argument in analytical writing.	อธิบายหลักการสำคัญห้าประการในการประเมินข้อโต้แย้งในการเขียนเชิงวิเคราะห์	With the listed principles, write a response in which you discuss what specific evidence is needed to evaluate the argument and explain how the evidence would weaken or strengthen the argument. === The following is a memorandum from the advertising head of Zorblatt Animal Outlets, a chain operating thirty animal outlets globally. "Half a decade ago, our rival Aquatic Pavilion started publicizing …	ตามหลักการที่ระบุไว้ ให้เขียนคำตอบโดยอภิปรายการหลักฐานเฉพาะที่จำเป็นในการประเมินข้อโต้แย้ง และอธิบายว่าหลักฐานจะทำให้ข้อโต้แย้งอ่อนลงหรือเข้มแข็งขึ้นได้อย่างไร === ต่อไปนี้เป็นบันทึกจากหัวหน้าฝ่ายโฆษณาของ Zorblatt Animal Outlets ซึ่งเป็นเครือข่ายที่ดำเนินกิจการร้านขายสัตว์ 30 แห่งทั่วโลก "ครึ่งทศวรรษที่แล้ว Aquatic Pavilion ซึ่งเป็นคู่แข่งของเราเริ่มเผยแพร่ในวารสาร Rare Pets Digest ยอดขายโดยรวมขอ…
77	77	Which methods did Socrates employ to challenge the prevailing thoughts of his time?	โสกราตีสใช้วิธีการใดเพื่อท้าทายความคิดที่มีอยู่ในสมัยของเขา	Let's bring Socrates to modern world. Generate a conversation between Socrates and Bill Gates to debate on generative AI for education.	นำโสกราตีสมาสู่โลกสมัยใหม่ สร้างการสนทนาระหว่างโสกราตีสและบิล เกตส์เพื่อหารือเกี่ยวกับปัญญาประดิษฐ์เชิงสร้างสรรค์ในด้านการศึกษา
78	78	What are some business etiquette norms when doing business in Japan?	บรรทัดฐานมารยาททางธุรกิจเมื่อทำธุรกิจในญี่ปุ่นมีอะไรบ้าง	Create a video script for training new employees of a car wash business in Japan. Highlight the above etiquette norms.	สร้างสคริปต์วิดีโอสำหรับฝึกอบรมพนักงานใหม่ในธุรกิจล้างรถในญี่ปุ่น เน้นบรรทัดฐานมารยาทข้างต้น
79	79	Suggest five award-winning documentary films with brief background descriptions for aspiring filmmakers to study.	แนะนำภาพยนตร์สารคดีที่ได้รับรางวัลห้าเรื่องพร้อมคำอธิบายภูมิหลังโดยย่อเพื่อให้ผู้สร้างภาพยนตร์ที่ต้องการศึกษา	With the spirit in the first film, craft a succinct and persuasive pitch for a film about overcoming adversity.	ด้วยจิตวิญญาณของภาคแรก ให้สร้างการนำเสนอที่กระชับและโน้มน้าวใจสำหรับภาพยนตร์เกี่ยวกับการเอาชนะความทุกข์ยาก
